# Supplementary material
Source: publisher figshare collection journal article supplement (https://sage.figshare.com/ndownloader/files/23949998)
Supplement: Supplementary file 1 [file 23949998]

**Supplementary Table 1:** Corresponding author email questions

| Question Number | Question                                                                                                                                              | Response Option                                                                                                                                                                                                                                                                                                                                                                                                                                                                                                                                                                                                                                                |
|-----------------|-------------------------------------------------------------------------------------------------------------------------------------------------------|----------------------------------------------------------------------------------------------------------------------------------------------------------------------------------------------------------------------------------------------------------------------------------------------------------------------------------------------------------------------------------------------------------------------------------------------------------------------------------------------------------------------------------------------------------------------------------------------------------------------------------------------------------------|
| 1               | Are you aware of the concept of a Core Outcome Set to inform the selection of outcome measures in clinical trials?                                    | <ul style="list-style-type: none"> <li>• YES / NO</li> </ul>                                                                                                                                                                                                                                                                                                                                                                                                                                                                                                                                                                                                   |
| 2i              | Did the Haywood et al (2014) hip fracture Core Outcome Set inform the selection of the outcome measures used in your trial? (If YES go to Question 4) | <ul style="list-style-type: none"> <li>• YES / NO</li> </ul>                                                                                                                                                                                                                                                                                                                                                                                                                                                                                                                                                                                                   |
| 2ii             | <i>If NO, why was this the case? Was it because:</i>                                                                                                  | <ul style="list-style-type: none"> <li>• Unaware of the existence of this Core Outcome Set</li> <li>• Used a different Core Outcome Set (if so, please provide the reference for this)</li> <li>• Was aware of the Core Outcome Set but felt it was not suitable for the intervention of interest (if so, please explain why)</li> <li>• Was aware of the Core Outcome Set but felt it was not suitable for the population (if so, please explain why)</li> <li>• Was not a requirement for the funder, so choose not to use</li> <li>• Was not a requirement for the regulatory authority, so chose not to use</li> <li>• Other (please state) ...</li> </ul> |
| 3               | What could be done to increase awareness of the Hip Fracture Core Outcome Set?                                                                        | <ul style="list-style-type: none"> <li>• Nothing, there is sufficient awareness of the Hip Fracture Core Outcome Set.</li> <li>• Explicit requirement in funding applications</li> <li>• Explicit requirement in publications and journals</li> <li>• Increased awareness of Core Outcome Sets in research training</li> <li>• Increased publicity across social media and clinical/academic forums</li> <li>• Other (please state)...</li> </ul>                                                                                                                                                                                                              |
| 4               | If an update to the existing Core Domain Set was proposed, what areas should these be focused on?                                                     | <ul style="list-style-type: none"> <li>• No extension required, a single Core Outcome Set for all hip fracture trials is sufficient</li> <li>• Trials recruiting people with cognitive impairment</li> <li>• Trials recruiting caregivers</li> </ul>                                                                                                                                                                                                                                                                                                                                                                                                           |

|      |                                                                                                       |                                                                                                                                                    |
|------|-------------------------------------------------------------------------------------------------------|----------------------------------------------------------------------------------------------------------------------------------------------------|
|      |                                                                                                       | <ul style="list-style-type: none"> <li>• Surgical intervention trials</li> <li>• Anaesthetic trials</li> <li>• Rehabilitation trials</li> </ul>    |
| 5i   | <i>Correspondent author details: Country you are based in:</i>                                        | <ul style="list-style-type: none"> <li>• Free-text</li> </ul>                                                                                      |
| 5ii  | <i>Correspondent author details: Role (please highlight your response):</i>                           | <ul style="list-style-type: none"> <li>• Academic</li> <li>• Clinician</li> <li>• Clinical academic</li> <li>• Other (please state) ...</li> </ul> |
| 5iii | <i>Correspondent author details: years qualified</i>                                                  | <ul style="list-style-type: none"> <li>• Free-text</li> </ul>                                                                                      |
| 5iv  | <i>Correspondent author details: highest educational attainment (please highlight your response):</i> | <ul style="list-style-type: none"> <li>• BSc/BA</li> <li>• MSc/MA</li> <li>• PhD/MD/DPhil</li> <li>• Other (please state) ...</li> </ul>           |
